# Supplementary material for: Ceratocystis cacaofunesta genome analysis reveals a large expansion of extracellular phosphatidylinositol-specific phospholipase-C genes (PI-PLC)
Source: PubMed Central journal article supplement (PMC5773145; doi:10.1186/s12864-018-4440-4), 2018-01-17
Supplement: 12864_2018_4440_MOESM2_ESM.pdf [file 12864_2018_4440_MOESM2_ESM.pdf]

**Additional File 2.** Functional annotation of total proteome of *C. cacaofunesta* and *C. fimbriata*.

Figure 2. Gene ontology GO and KEGG classification of predicted genes in *C. cacaofunesta* genome A. Biological process (BP). B and C. Distribution of predicted genes involved in metabolic pathway by General and specific KEGG Categories respectively.

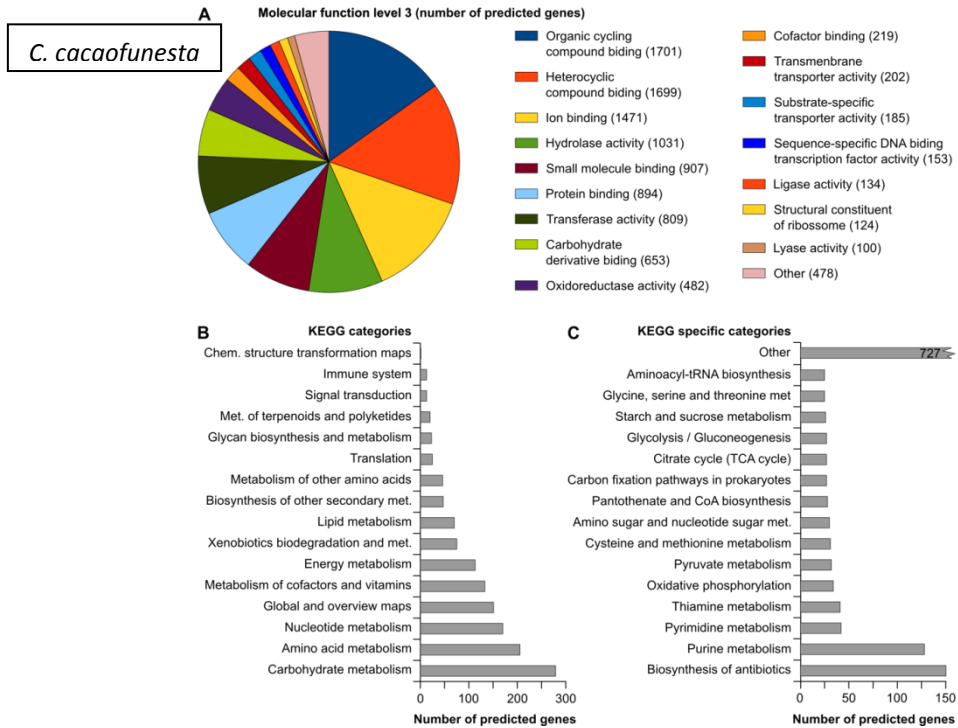

Figure 2. Gene Ontology GO and KEGG classification of predicted genes in *C. cacaofunesta* and *C. fimbriata*. (A). Biological Process (BP). (B) and (C) Distribution of predicted genes involved in pathway by General and Specific KEGG Categories, respectively.

Figure 3. Functional annotation of *C. cacaofunesta* and *C. fimbriata* using GO (Biological Process)

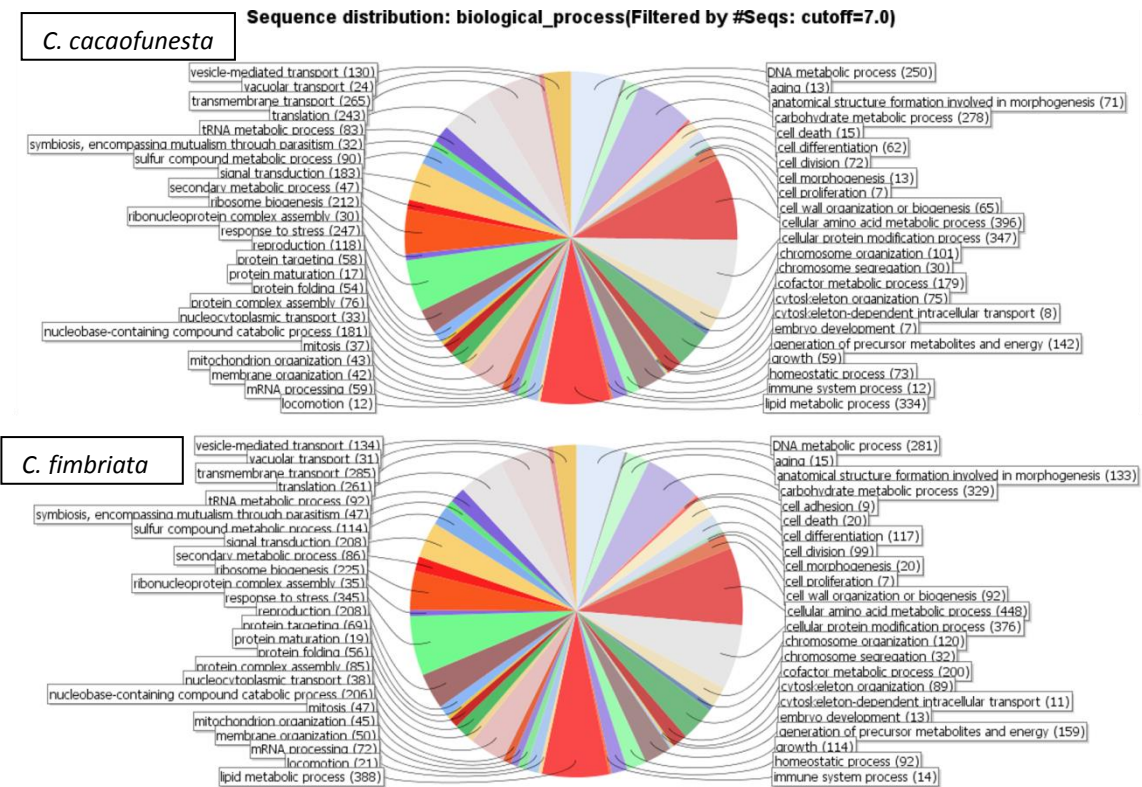

Figure 3. Functional annotation of total *C. cacaofunesta* and *C. fimbriata* total proteomes – GO/Biological Process, Cutoff 7.

Figure 4. Functional annotation of *C. cacaofunesta* and *C. fimbriata* using GO (Molecular Function).

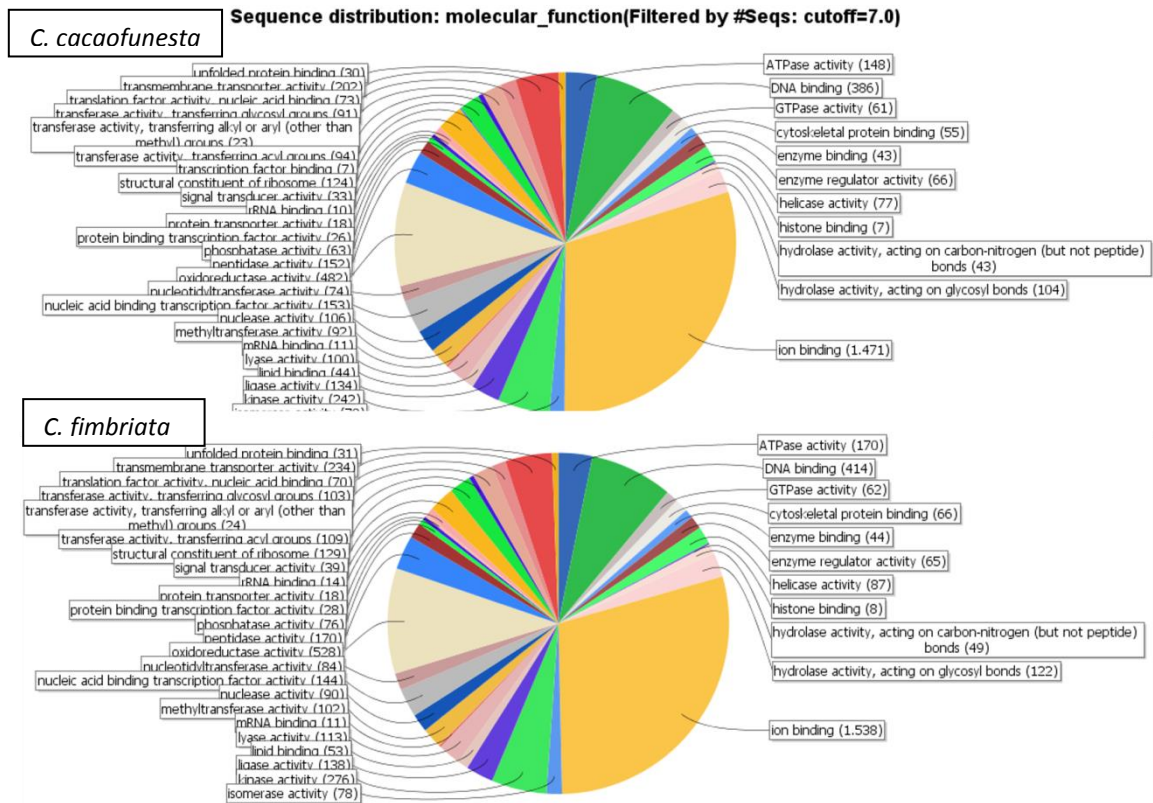

Figure 4. Functional Annotation of *C. cacaofunesta* and *C. fimbriata* total proteomes – GO/Molecular Function, Cut off 7.

Figure 5. Functional annotation of *C. cacaofunesta* and *C. fimbriata* using GO (Biological Cellular component)

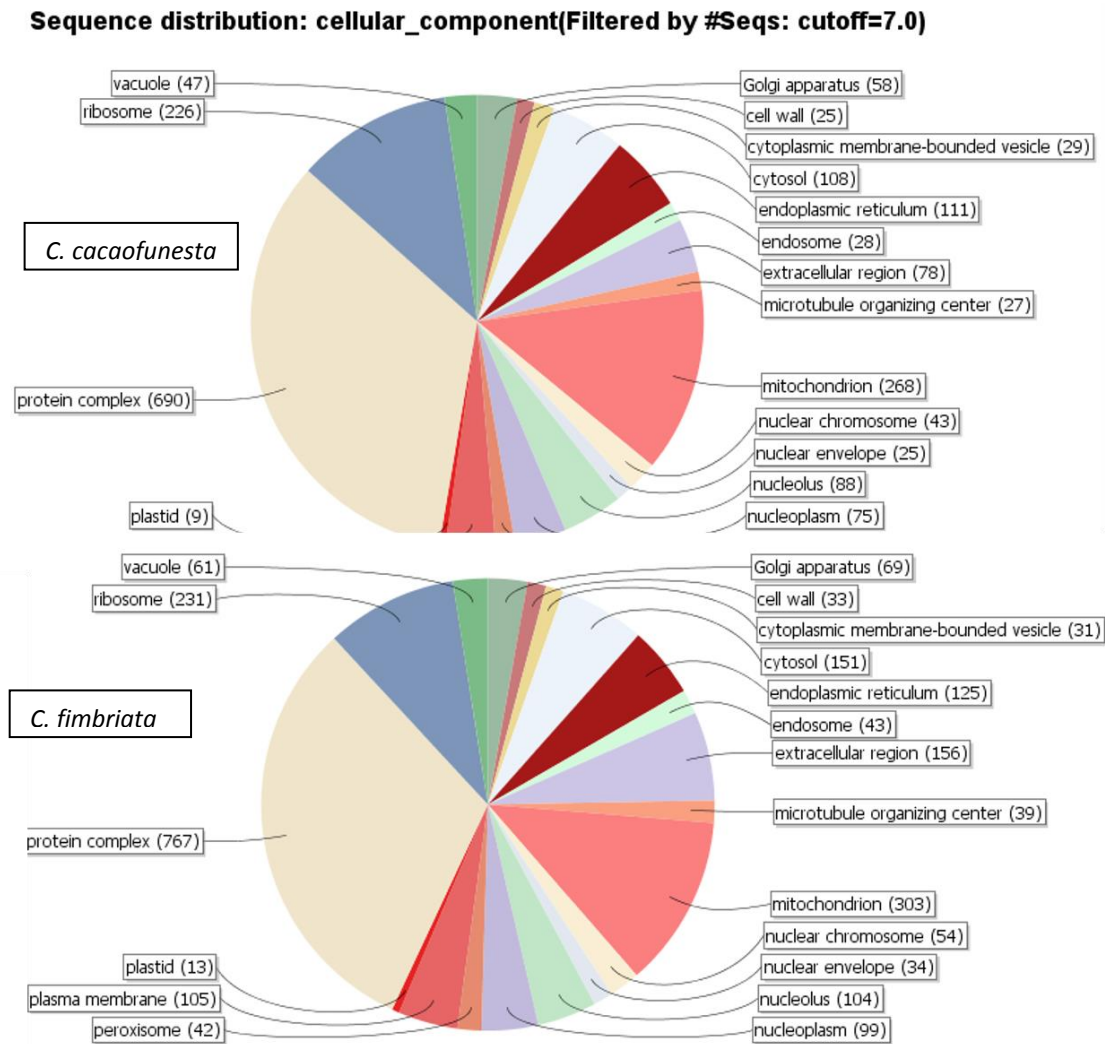

Figure 5. Functional annotation of *C. cacaofunesta* and *C. fimbriata* total proteomes – GO/Cellular Components, Cut off 7.
