# Supplementary material for: Ceratocystis cacaofunesta genome analysis reveals a large expansion of extracellular phosphatidylinositol-specific phospholipase-C genes (PI-PLC)
Source: PubMed Central journal article supplement (PMC5773145; doi:10.1186/s12864-018-4440-4), 2018-01-17
Supplement: 12864_2018_4440_MOESM8_ESM.pdf [file 12864_2018_4440_MOESM8_ESM.pdf]

**Additional File 8. Comparative analyses within *Ceratocystis* genomes and *Huntiella moniliformis*.**

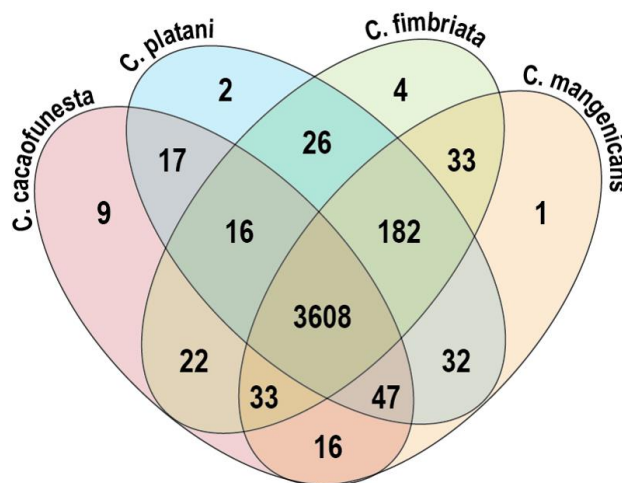

**Figure 1.** Venn diagram comparing the number of gene clusters shared and exclusive among *Ceratocystis* species.

**Table 1.** Genome descriptive statistics for *C. cacaofunesta* compared with other *Ceratocystis* species genomes and *Huntiella moniliformis*.

|                              | <i>Ceratocystis cacaofunest</i> <sup>1</sup> | <i>Ceratocystis fimbriata</i> <sup>2</sup> | <i>Ceratocystis manginecans</i> <sup>3</sup> | <i>Ceratocystis platani</i> <sup>4</sup> | <i>Huntiella moniliformis</i> <sup>3</sup> |
|------------------------------|----------------------------------------------|--------------------------------------------|----------------------------------------------|------------------------------------------|--------------------------------------------|
| <b>Life style</b>            | Necrotrophic                                 | Necrotrophic                               | Necrotrophic                                 | Necrotrophic                             | Saprophytic                                |
| <b>Natural hosts</b>         | Cacao                                        | Multiple                                   | Multiple                                     | Platanus                                 | Multiple                                   |
| <b>Genome size (Mbp)</b>     | 30.50                                        | 29.41                                      | 31.71                                        | 29.18                                    | 25.43                                      |
| <b>Number of scaffolds</b>   | 229                                          | 2,641                                      | 980                                          | 1,213                                    | 365                                        |
| <b>N50 (kbp)</b>             | 386                                          | 428                                        | 77                                           | 77                                       | 191                                        |
| <b>GC content (%)</b>        | 48.1                                         | 48.1                                       | 47.9                                         | 48.2                                     | 48.0                                       |
| <b>Number of gene models</b> | 7,382                                        | 7,200                                      | 7,494                                        | 5,622                                    | 6,832                                      |
| <b>Gene density (/Mbp)</b>   | 242                                          | 245                                        | 236                                          | 193                                      | 269                                        |
| <b>Assembly software</b>     | Velvet                                       | Newbler                                    | Velvet                                       | GLC                                      | AbySS                                      |
| <b>Genome coverage</b>       | 103X                                         | 20.0X                                      | 22X                                          | 655X                                     | 38X                                        |

1 This study; 2 Wilken et al. 2013; 3 Van der Nest et al. 2014; 4 Belbahri L. 2015.

**References:**

2. Wilken, P.M. et al., 2013. IMA Genome-F 1: *Ceratocystis fimbriata*: Draft nuclear genome sequence for the plant pathogen, *Ceratocystis fimbriata*. IMA fungus, 4(2), pp.357–8.

3. van der Nest, M.A. et al., 2014. Draft genome sequences of *Diplodia sapinea*, *Ceratocystis manginecans*, and *Ceratocystis moniliformis*. *IMA Fungus*, 5(1), pp.135–140.
4. Belbahri, L. (2015). Genome sequence of *Ceratocystis platani*, a major pathogen of plane trees. URL <http://www.ncbi.nlm.nih.gov/nuccore/814603118>.
